# Supplementary material for: Bacillus subtilis and Pseudomonas fluorescens Trigger Common and Distinct Systemic Immune Responses in Arabidopsis thaliana Depending on the Pathogen Lifestyle
Source: PubMed Central journal article supplement (PMC7563191; doi:10.3390/vaccines8030503), 2020-09-04
Supplement: vaccines-08-00503-s001.pdf [file vaccines-08-00503-s001.pdf]

## Supplementary material

**Table S1:** Primer sequences of the different genes used in this study

| <b>Genes</b>  | <b>Locus</b> | <b>Forward Primer (5' – 3')</b> | <b>Reverse Primer (3' – 5')</b> |
|---------------|--------------|---------------------------------|---------------------------------|
| <i>PR1</i>    | AT2G14610    | TCTTCCCTCGAAAGCTCAAG            | AAGGCCACCAGAGTGTATG             |
| <i>PR4</i>    | AT3G04720    | AACAATGCGGTCGTCAAGGC            | AAGCACTCACGGCTCTCAAATCCC        |
| <i>PDF1.2</i> | AT5G44420    | TCACCCTTATCTTCGCTGCT            | GTTGCATGATCCATGTTTGG            |
| <i>UBQ5</i>   | AT3G62250    | GGAAGAAGAAGACTTACACC            | AGTCCCACTTACCACAGTA             |
